# Supplementary material for: High-Entropy Oxide of (BiZrMoWCeLa)O2 as a Novel Catalyst for Vanadium Redox Flow Batteries
Source: PubMed Central journal article supplement (PMC10910445; doi:10.1021/acsami.3c15783), 2024-02-20
Supplement: am3c15783_si_001.pdf [file am3c15783_si_001.pdf]

## Supporting Information

### High-entropy Oxide of (BiZrMoWCeLa)O<sub>2</sub> as Novel Catalyst for Vanadium Redox Flow Batteries

Aknachew Mebreku Demeku,<sup>1</sup> Daniel Manaye Kabtamu,<sup>#1,2</sup> Guan-Cheng Chen,<sup>1</sup> Yun-Ting Ou,<sup>1</sup> Zih-Jhong Huang,<sup>1</sup> Ning-Yih Hsu,<sup>3</sup> Hung-Hsien Ku,<sup>3</sup> Yao-Ming Wang,<sup>4</sup> Chen-Hao Wang\*<sup>1,5,6</sup>

<sup>1</sup>*Department of Materials Science and Engineering, National Taiwan University of Science and Technology, Taipei 106335, Taiwan*

<sup>2</sup>*Department of Chemistry, Debre Berhan University, Po.Box: 445, Debre Berhan, Ethiopia*

<sup>3</sup>*Chemistry Division, National Atomic Research Institute, 325207, Taoyuan, Taiwan*

<sup>4</sup>*Maritime Innovation & Industry Promotion Department, Metal Industries Research & Development Centre, Kaohsiung 811160, Taiwan*

<sup>5</sup>*Hierarchical Green-Energy Materials (Hi-GEM) Research Center, National Cheng Kung University, Tainan 701401, Taiwan*

<sup>6</sup>*Center of Automation and Control, National Taiwan University of Science and Technology, Taipei 106335, Taiwan*

\*Corresponding author: [chwang@mail.ntust.edu.tw](mailto:chwang@mail.ntust.edu.tw) (Prof. Chen-Hao Wang) Fax: +886-2-2737-6544; Tel: +886-2-2730-3715

#Co-corresponding author: [danielmanaye@gmail.com](mailto:danielmanaye@gmail.com) (Dr. Daniel M. Kabtamu)

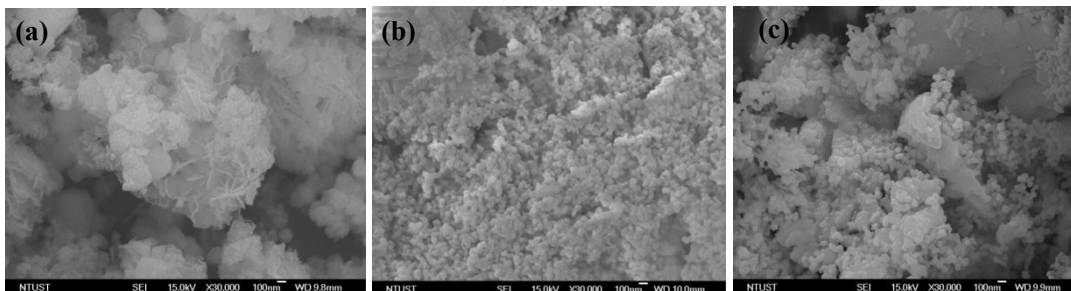

**Figure S1** SEM images of the (a) HEO-550, (b) HEO-750, and (c) HEO-900.

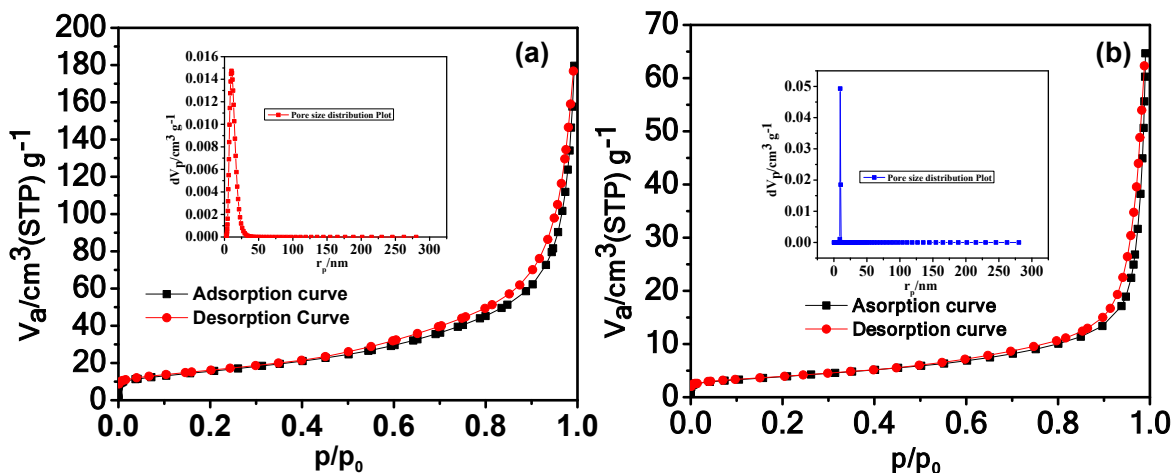

**Figure S2** (a) Nitrogen adsorption-desorption isotherms of the BET measurement as-synthesized HEO-750, (b) HEO-900.

**Table S1** BET and BJH measurement results obtained from **Figure S2** (a-b).

| Electrocatalysts | Surface area ( $\text{m}^2 \text{g}^{-1}$ ) | Porosity ( $\text{cm}^3 \text{g}^{-1}$ ) |                         |
|------------------|---------------------------------------------|------------------------------------------|-------------------------|
|                  |                                             | Total pore volume                        | Mean pore diameter (nm) |
| HEO-750          | 54.743                                      | 0.251                                    | 18.34                   |
| HEO-900          | 13.125                                      | 0.098                                    | 29.81                   |

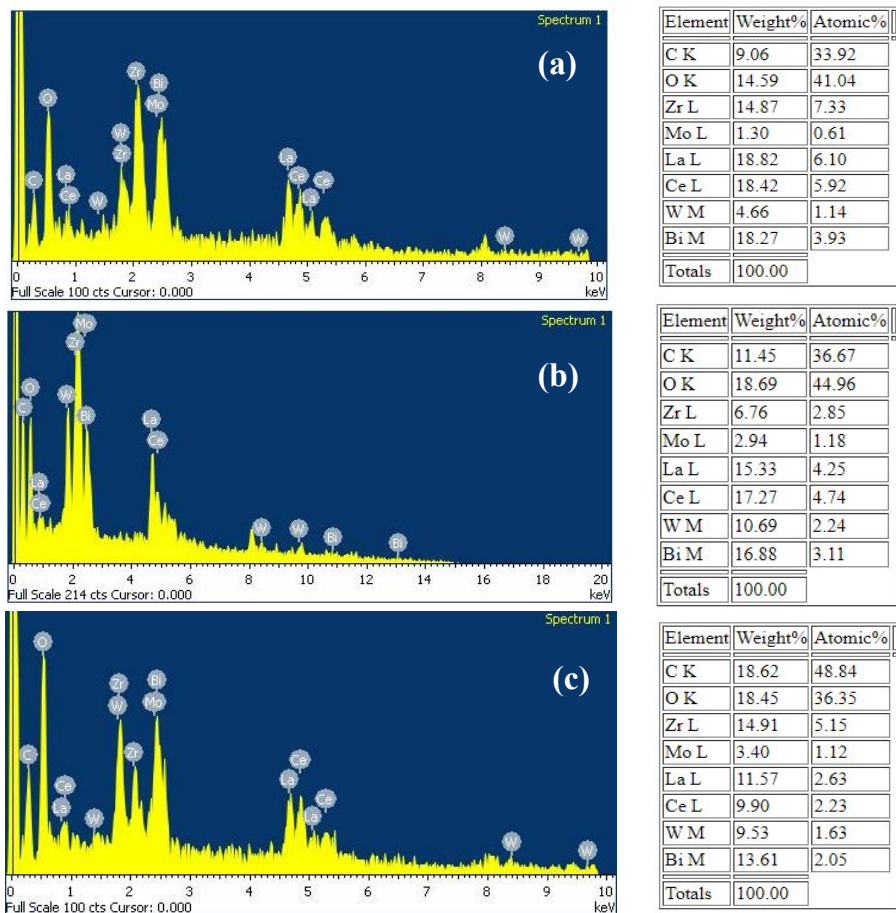

**Figure S3** EDS graph of the (a) HEO-550, (b) HEO-750, and (c) HEO-900.

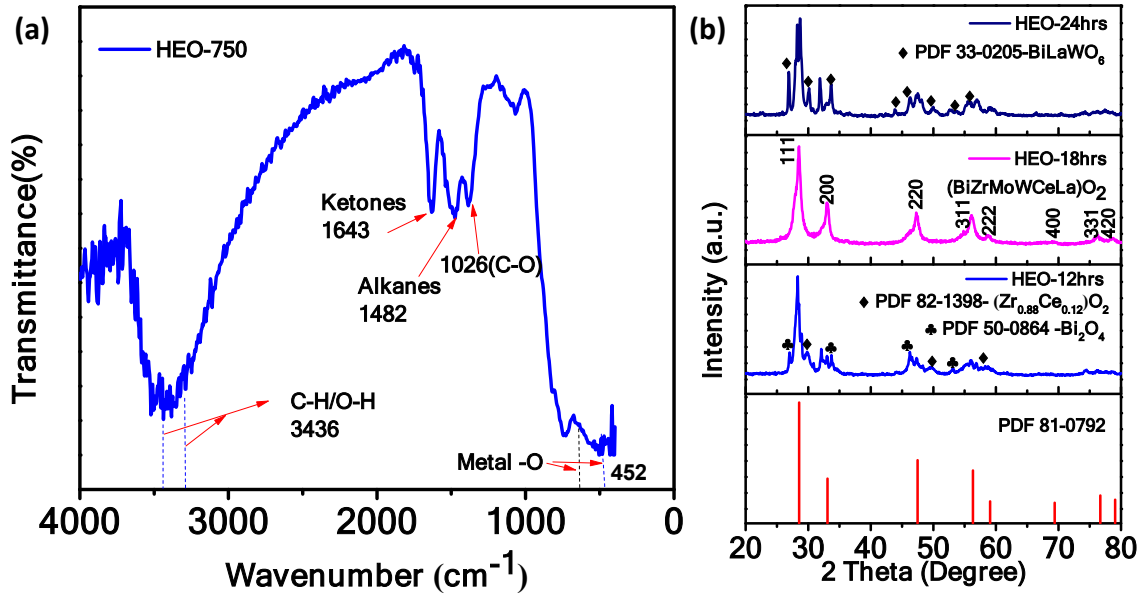

**Figure S4** (a) The FTIR spectrum and (b) XRD patterns of different hydrothermal treatments of (12, 18, and 24) hrs of HEO-750 nanoparticles.

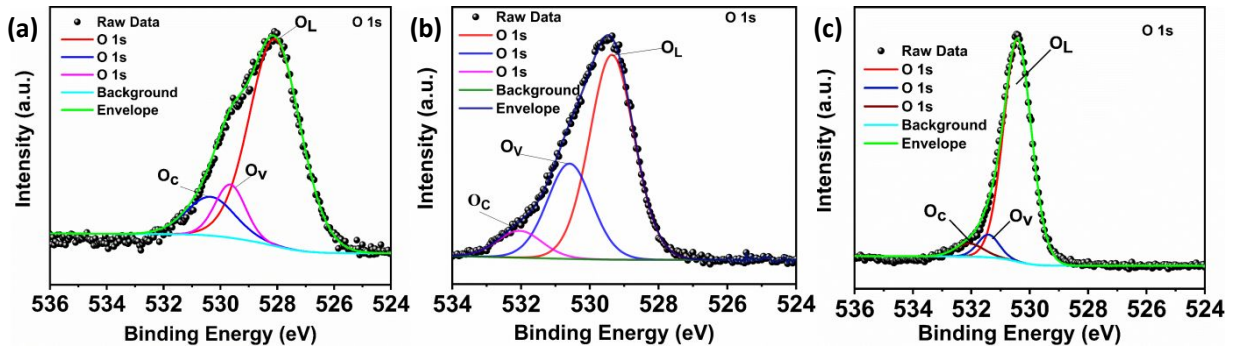

**Figure S5** The O 1s XPS spectra of (a) HEO-550, (b) HEO-750, and (c) HEO-900.

**Table S2** The fitting results of XPS O 1s spectra obtained from **Figure S5**.

| O1s     | Lattice oxygen ( $O_L$ ) | Oxygen vacancy ( $O_v$ ) | Chemisorbed oxygen ( $O_C$ ) |
|---------|--------------------------|--------------------------|------------------------------|
| HEO-550 | 29.23 %                  | 13.42 %                  | 57.34 %                      |
| HEO-750 | 3.69 %                   | 17.74 %                  | 78.56 %                      |
| HEO-900 | 84.9 %                   | 6.91 %                   | 5.3 %                        |

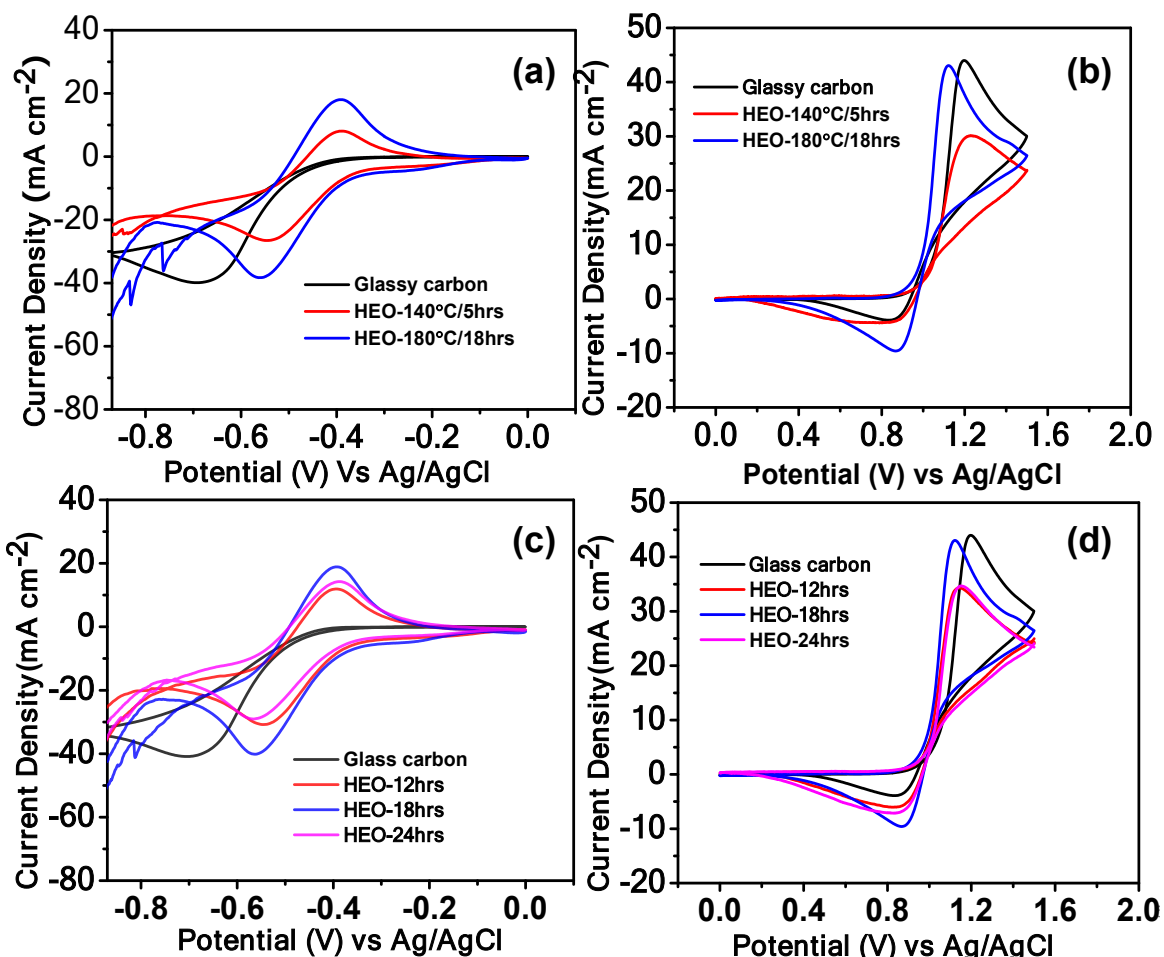

**Figure S6** The cycle voltammetry (CV) curves of (a, b) HEO-(140°C, 180°C)/(5, 18) hrs, (c, d) HEO-(12, 18, 24) hrs in Anolyte and Catholyte, respectively in the electrolyte solutions of 1.6 M  $VOSO_4 + 4.6$  M  $H_2SO_4$  at the scan rate of  $10$  mV s<sup>-1</sup>.

**Table S3** The cyclic voltammetry results obtained from **Figure S6**.

| Types    |                                       | Electrodes       |                        |                         |                         |                         |
|----------|---------------------------------------|------------------|------------------------|-------------------------|-------------------------|-------------------------|
|          |                                       | Glassy<br>carbon | HEO-<br>140°C<br>/5hrs | HEO-<br>180°C<br>/12hrs | HEO-<br>180°C<br>/18hrs | HEO-<br>180°C<br>/24hrs |
| Negative | $I_{pa}/I_{pc}$ (mA/cm <sup>2</sup> ) | -                | 0.88                   | 1.13                    | 1.02                    | 1.23                    |
| side     | $\Delta E_p$ (mV)                     | -256             | -148                   | -170                    | -169                    | -180                    |
| Positive | $I_{pa}/I_{pc}$ (mA/cm <sup>2</sup> ) | 1.7              | 1.92                   | 1.62                    | 1.43                    | 1.59                    |
| side     | $\Delta E_p$ (mV)                     | 286              | 278                    | 251                     | 233                     | 245                     |

The CV curves of the HEO-750 electrode for the  $VO^{2+}/VO_2^+$  were conducted at different scan rates, as shown in **Figure S7a**. The peak current ( $i_{pa}$  and  $i_{pc}$ ) as a function of the square root of the scanning rate for the HEO-750 electrode (**Figure S7b**). The cathodic and anodic peak current densities of the  $VO^{2+}/VO_2^+$  redox pair are proportional to the square root of the scan rate, indicating that the electrochemical behavior of the redox couple at the electrode was diffusion controlled.<sup>1</sup> Because peak current versus square root of scan rate is nonlinear, CV is not the best way to determine kinetic parameters. Therefore, the kinetic parameters were determined using the rotating disc electrode (RDE) method, i.e., LSV curves. The electrode reaction rates of HEO-750 were investigated using linear sweep voltammetry (LSV), as shown in **Figure S8**. The rotation speed was varied from 200 rpm to 2000 rpm (**Figure S8a**). LSV was scanned from 0 V to 2 V on the positive side versus Ag/AgCl at the scan rate of 2 mV s<sup>-1</sup>. The linear relationship between limiting current,  $i_L$ , and the square root of rotation speed ( $\omega^{1/2}$ ) is shown in **Figure S8b**, which reveals the good electrochemical activity of HEO-750. **Figure S8b** plots the Levich behavior of the HEO-750 assembled electrodes governed by the equation below.<sup>2,3</sup>

$$i_L = 0.62nFAD^{2/3}\omega^{1/2}\nu^{-1/6}C_0 \quad (1)$$

$$i_k = nFAk^0C_0 = nFAk^0C_0 \exp\left(\frac{-\alpha nF(E - E^0)}{RT}\right) \quad (2)$$

From the slopes of the curves given in **Figure S8b**, the calculated diffusion coefficients for  $VOSO_4$  using **Equation 1** are  $2.1246 \times 10^{-5} \text{ cm}^2 \text{ s}^{-1}$ . **Figure S8c** is obtained by taking the logarithm of the reciprocal of the y-intercepts of **Figure S8d**. The values of  $k^0$  were obtained from  $i_0$  using

**Equation 2.** The exchange current and estimated standard rates constant are  $7.75 \times 10^{-3}$  A and  $2.5 \times 10^{-4}$  cm s<sup>-1</sup>, respectively.

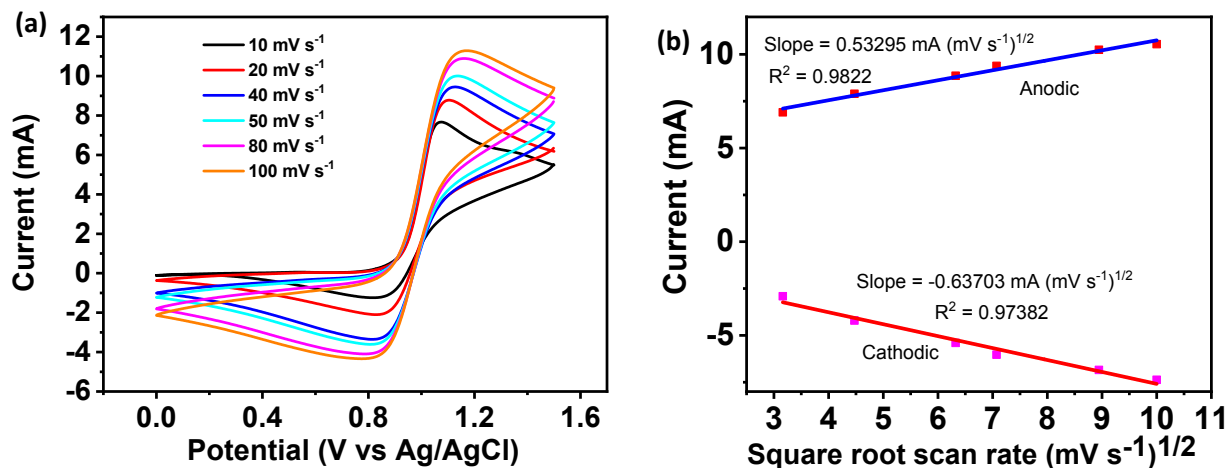

**Figure S7** (a) CV curves of HEO-750 electrode in 1.6 M VOSO<sub>4</sub> in 4.6 M H<sub>2</sub>SO<sub>4</sub> electrolyte at scan rates ranging from 10 to 100 mV s<sup>-1</sup>. (b) Peak current (*i*<sub>pa</sub> and *i*<sub>pc</sub>) as a function of the square root of the scanning rate for the HEO-750 electrode.

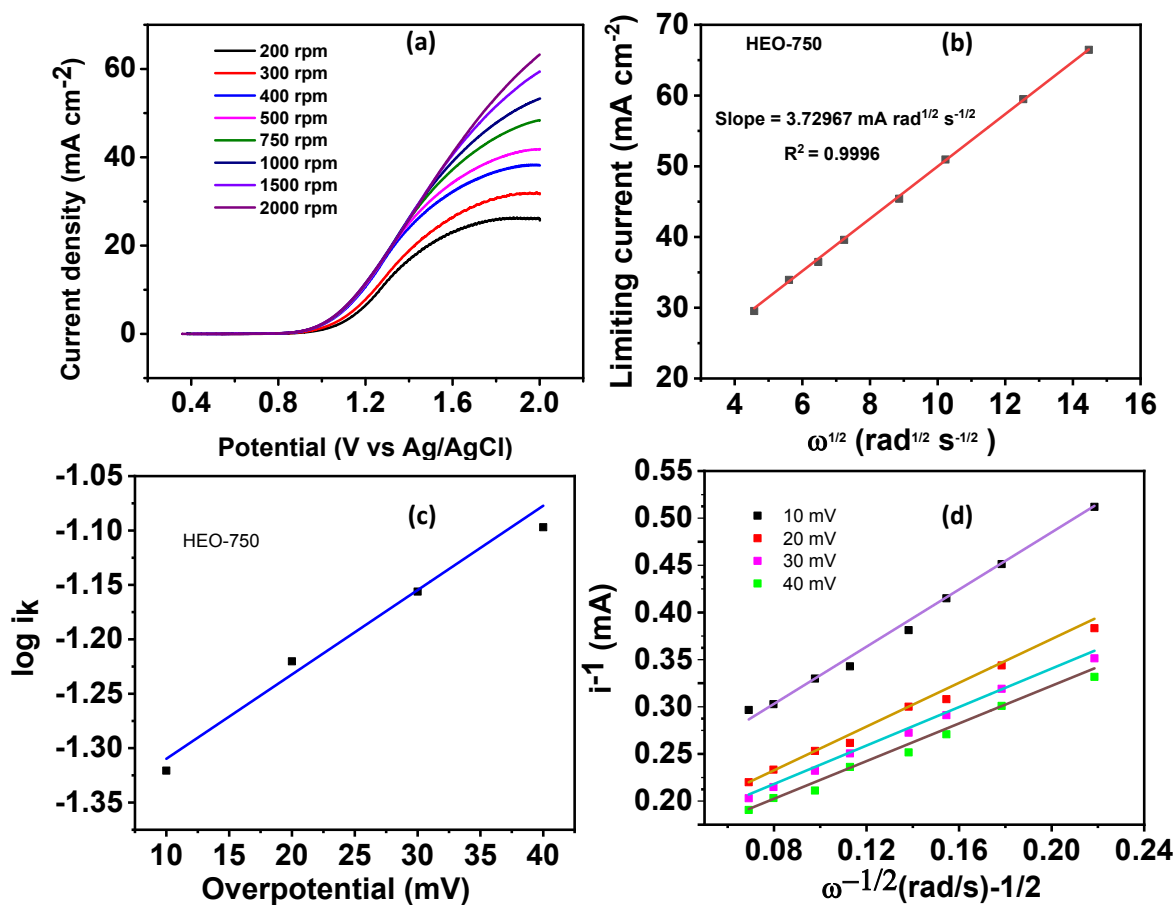

**Figure S8** (a) Anodic polarization curves of HEO-750 electrode at different electrode rotating speeds, (b) Linear fitted Levich plots of the limiting current density ( $i_L$ ) versus the square root of rotation rates ( $\omega^{1/2}$ ), (c) Linearly fitted plots of  $\log i_k$  as a function of the overpotential ( $\eta$ ) (d). Linearly fitted Koutecky-Levich plots of  $i^{-1}$  versus  $\omega^{-1/2}$ .

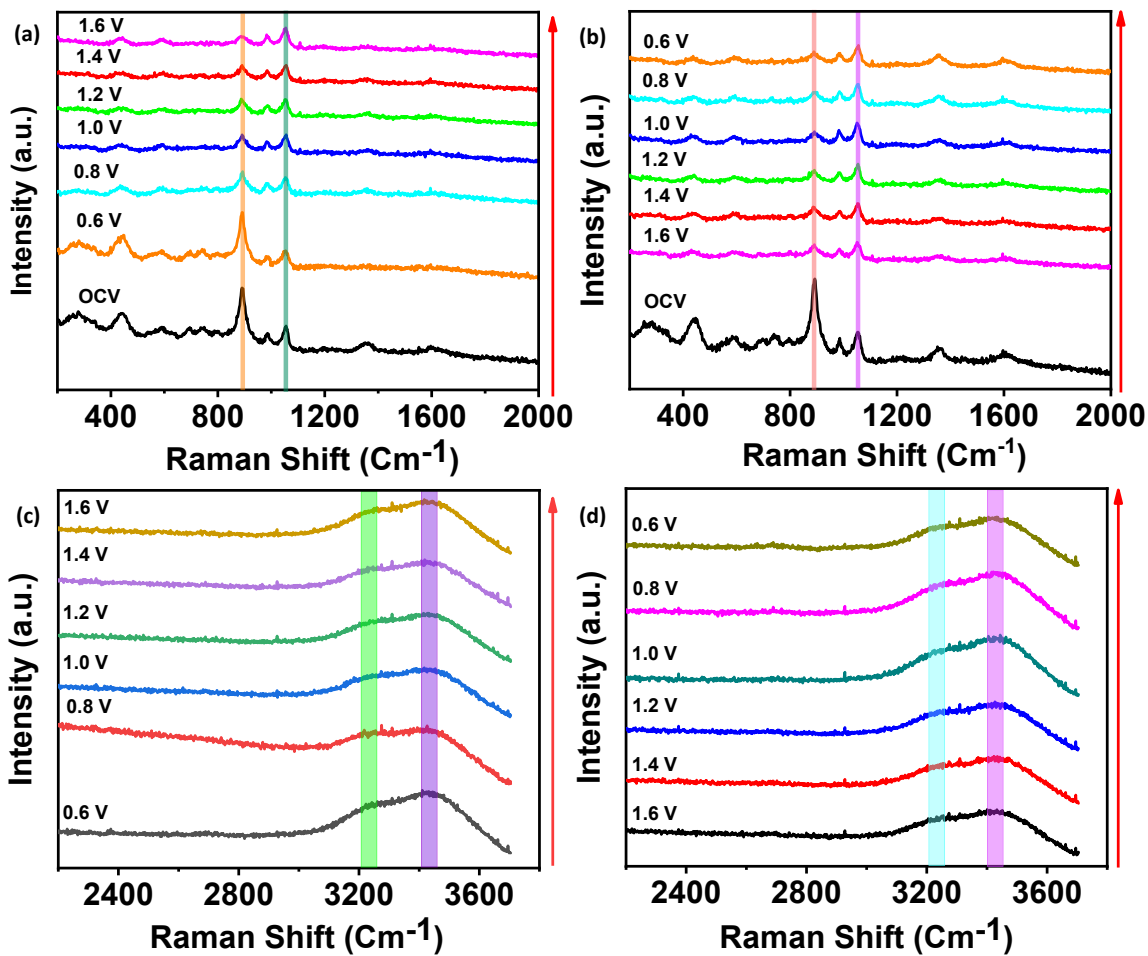

**Figure S9** Potential-dependent in situ Raman spectra measured at (a, b) low wavenumber and (c, d) high wavenumber regimes of HEO-750 in 0.05 M  $\text{VOSO}_4$  + 2 M  $\text{H}_2\text{SO}_4$ .



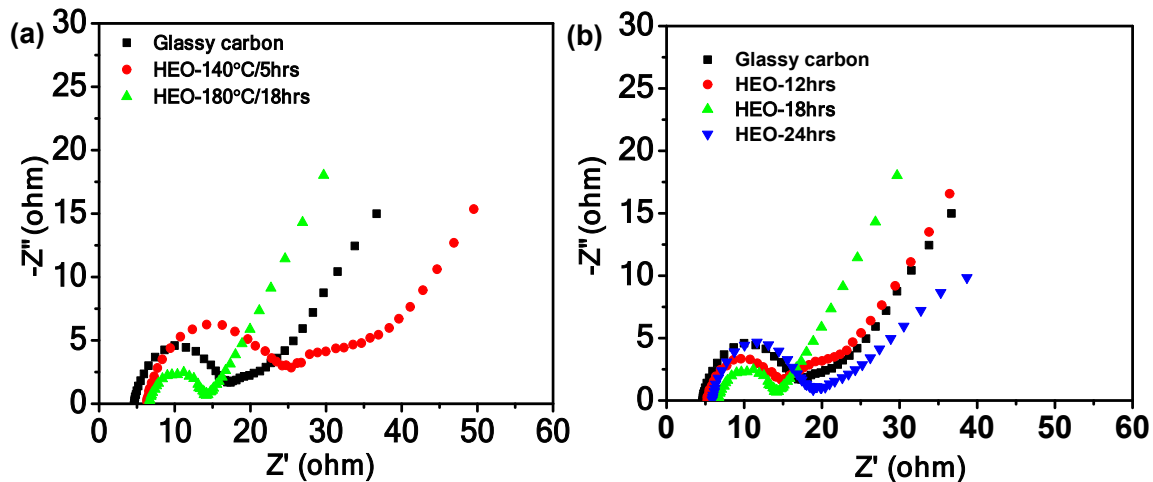

**Figure S10** Nyquist plots of of (a) HEO-(140°C, 180°C)/(5, 18) hrs and(b) HEO-(12, 18, 24) hrs in the electrolyte solutions of 1.6 M  $\text{VO}_2\text{SO}_4$  + 4.6 M  $\text{H}_2\text{SO}_4$  at a polarization potential of 1.0 V.

**Table S4** EIS results obtained from **Figures S10a** and **S10b**.

| Resistances                                      | Electrodes    |                |                 |                 |                 |
|--------------------------------------------------|---------------|----------------|-----------------|-----------------|-----------------|
|                                                  | Glassy carbon | HEO-140°C/5hrs | HEO-180°C/12hrs | HEO-180°C/18hrs | HEO-180°C/24hrs |
| <b><math>R_s</math> (<math>\Omega</math>)</b>    | 4.59          | 6.23           | 5.65            | 6.53            | 5.92            |
| <b><math>R_{ct}</math> (<math>\Omega</math>)</b> | 11.39         | 13.93          | 10.55           | 7.66            | 10.87           |

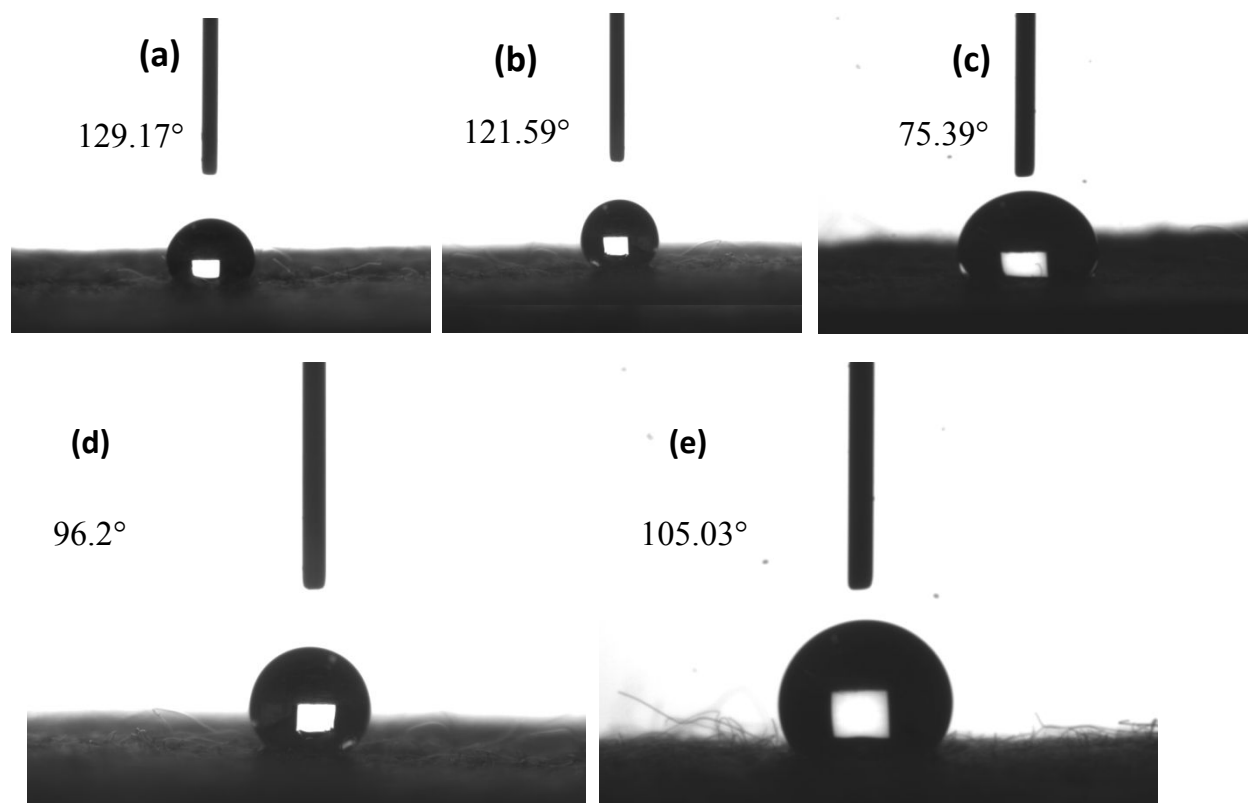

**Figure S11** Photographs of the contact angle measurements on (a) PGF, (b) TGF, (c) TGF-HEO-750, (d) TGF-HEO-550, and (e) TGF-HEO-900.

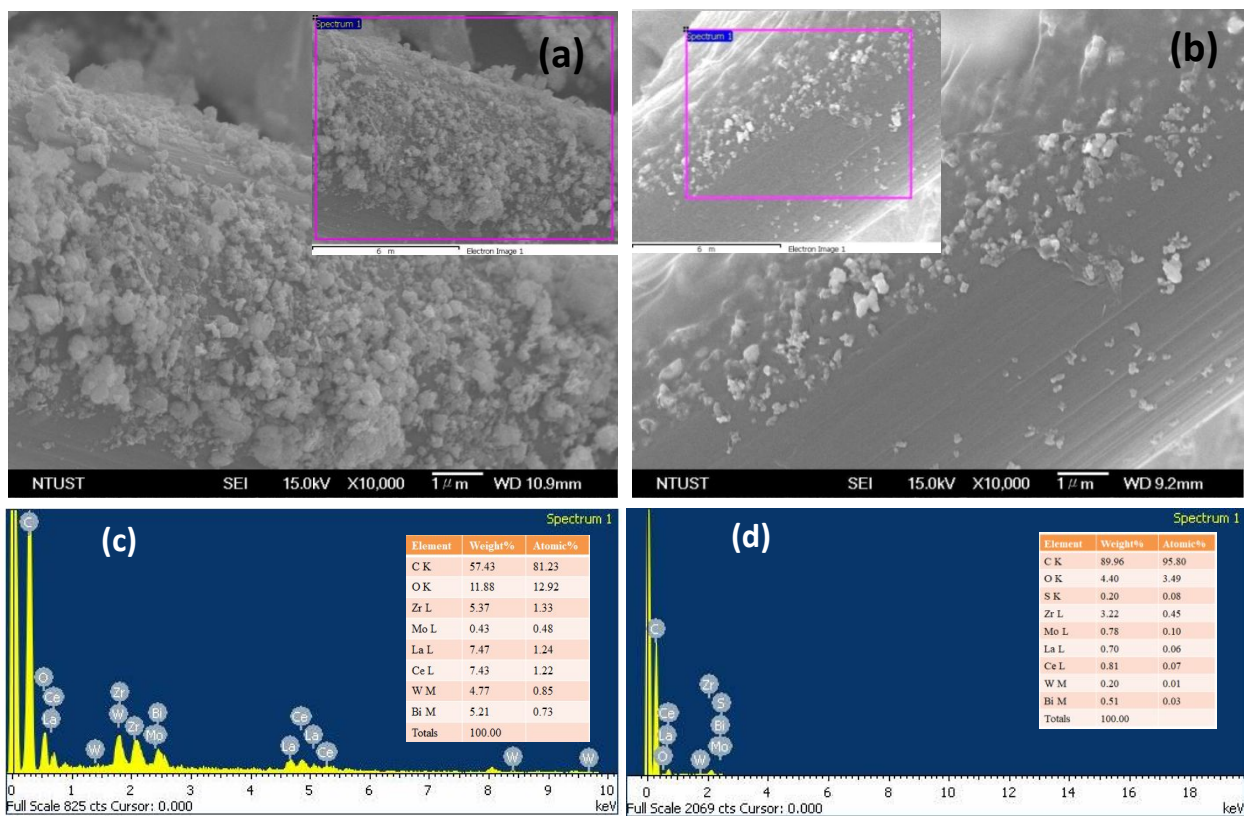

**Figure S12** SEM images of TGF-HEO-750 (a) before charge-discharge, (b) after charge-discharge, and (c, d) the elemental mapping of TGF-HEO-750 before and after charge-discharge, respectively.

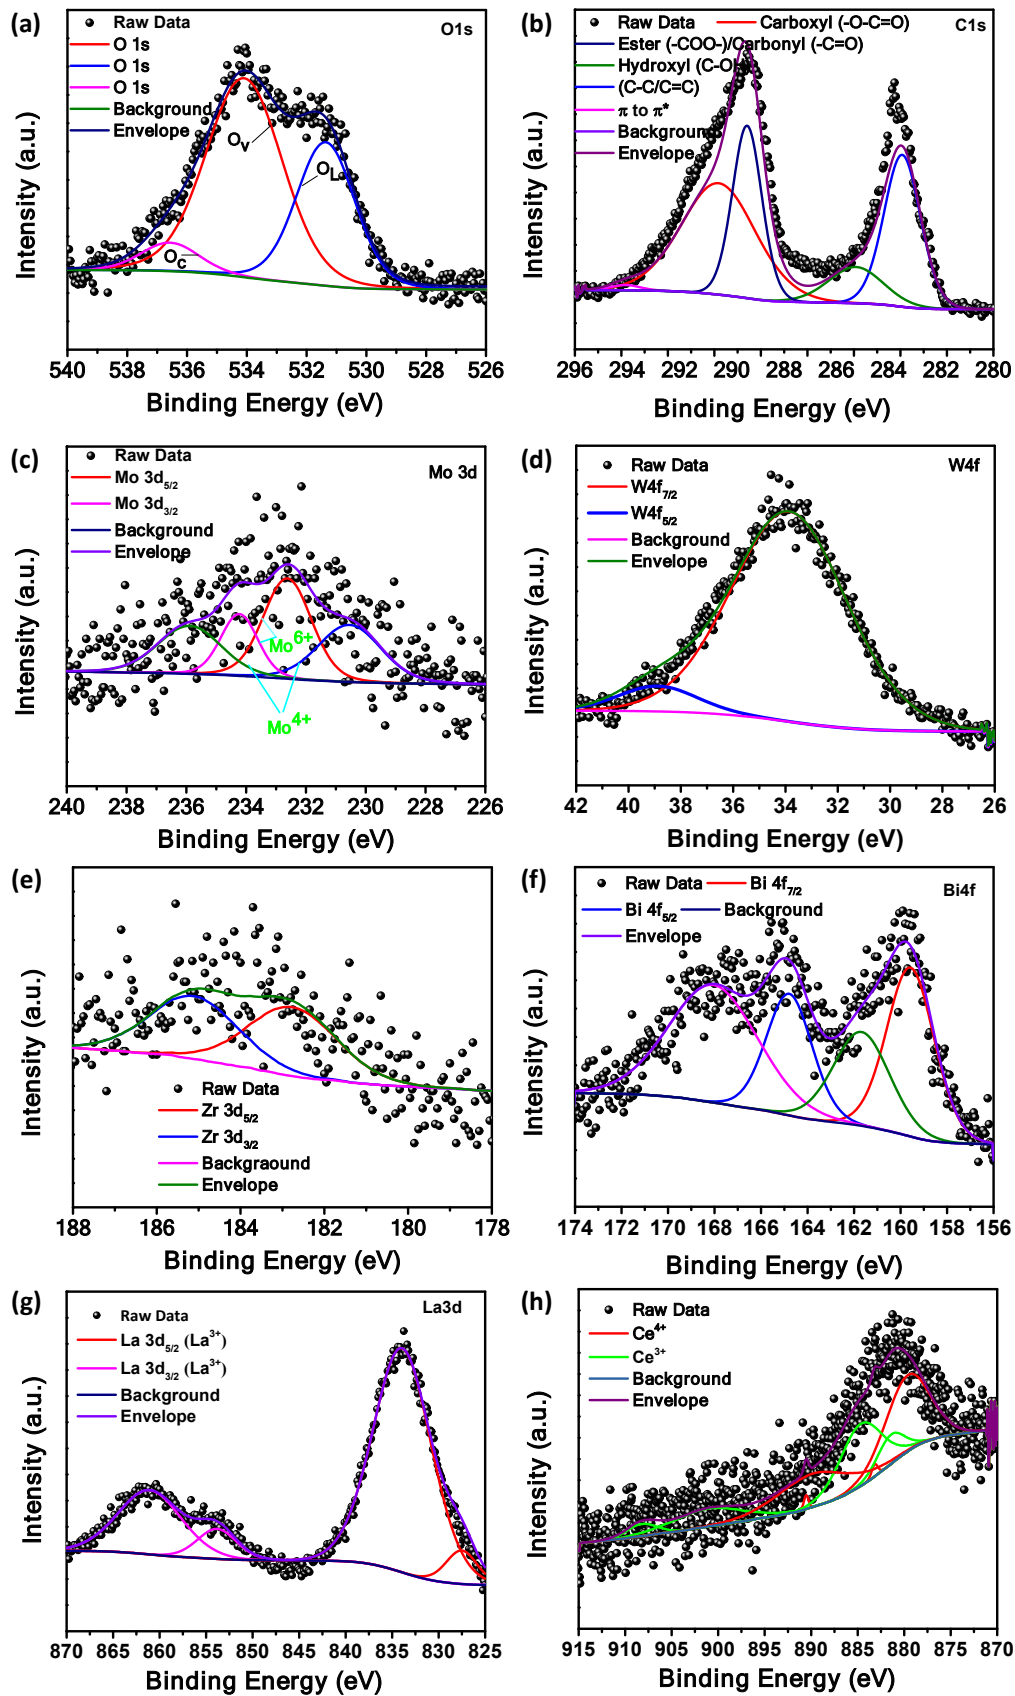

**Figure S13** XPS spectra (a) O1s, (b) C1s, (c) Mo3d, (d) W4f, (e) Zr3d, (f) Bi4f, (g) La3d, (h) Ce3d of TGF-HEO-750 electrode after charge-discharge cycles.

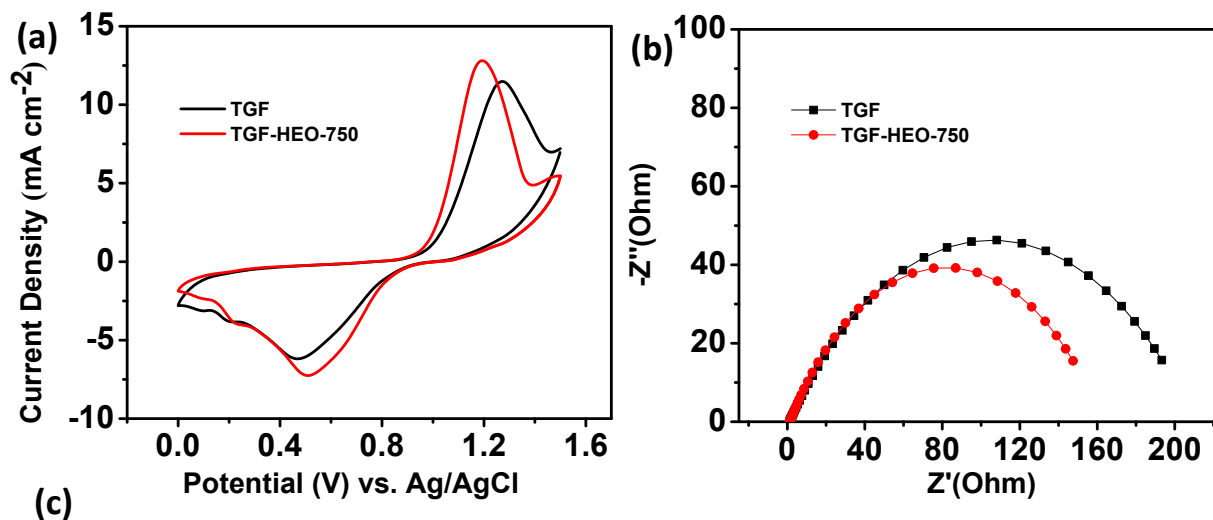

| Electrodes  | $J_{pa}$<br>( $\text{mA cm}^{-2}$ ) | $J_{pc}$<br>( $\text{mA cm}^{-2}$ ) | $ J_{pa}/J_{pc} $ | $E_{pa}$<br>(V) | $E_{pc}$<br>(V) | $\Delta E_p$ | $R_s$<br>( $\Omega$ ) | $R_{ct}$<br>( $\Omega$ ) |
|-------------|-------------------------------------|-------------------------------------|-------------------|-----------------|-----------------|--------------|-----------------------|--------------------------|
| TGF         | 11.4012                             | -6.012                              | 1.896             | 1.2711          | 0.4741          | 0.797        | 1.127                 | 209                      |
| TGF-HEO-750 | 12.956                              | -7.2412                             | 1.789             | 1.1947          | 0.5185          | 0.676        | 1.305                 | 160                      |

**Figure S14.** (a, c) the CV curves of TGF and TGF-HEO-750 and the corresponding values of  $I_{pa}/I_{pc}$  and  $\Delta E_p$  with a scan rate of  $5 \text{ mV s}^{-1}$ ; (b, c) the Nyquist plots of the TGF and TGF-HEO-750, and the corresponding  $R_s$  and  $R_{ct}$  values at open-circuit potential 5 mV, towards  $\text{VO}^{2+}/\text{VO}_2^+$  in  $0.05 \text{ M VO}_2\text{SO}_4 + 2 \text{ M H}_2\text{SO}_4$  solutions after charge-discharge cycles.

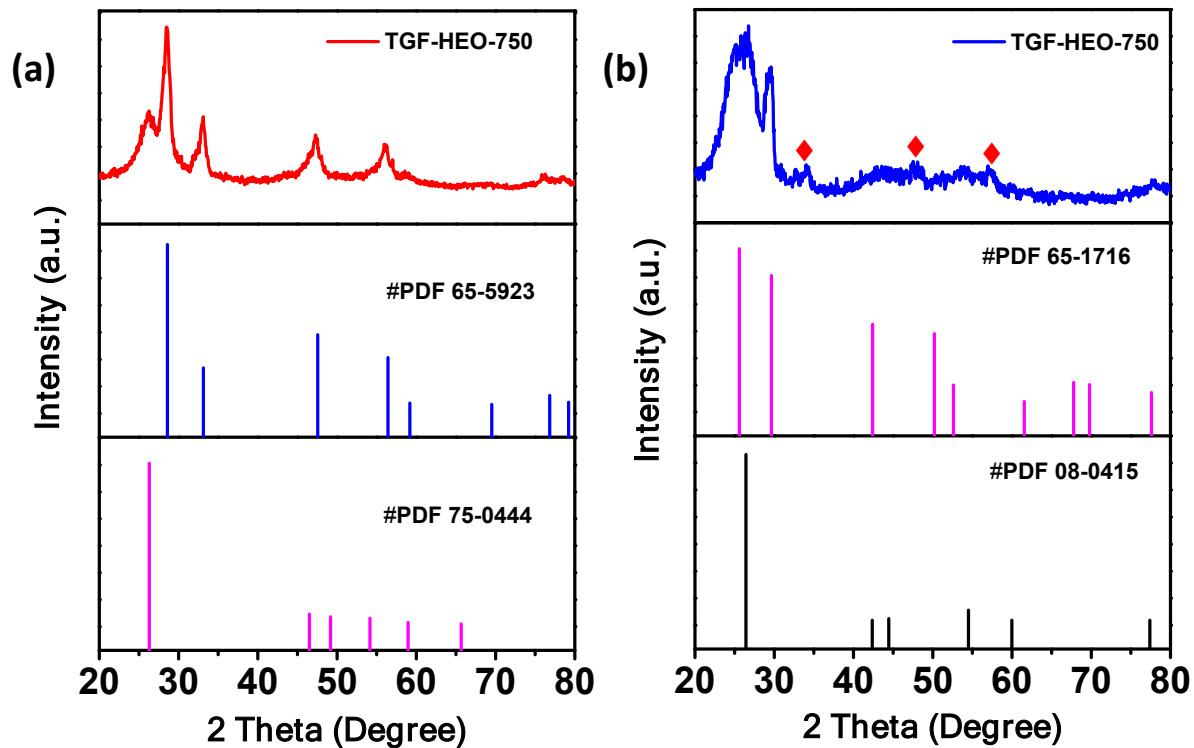

Figure S15. XRD pattern of TGF-HEO-750 (a) before and (b) after charge-discharge cycles.

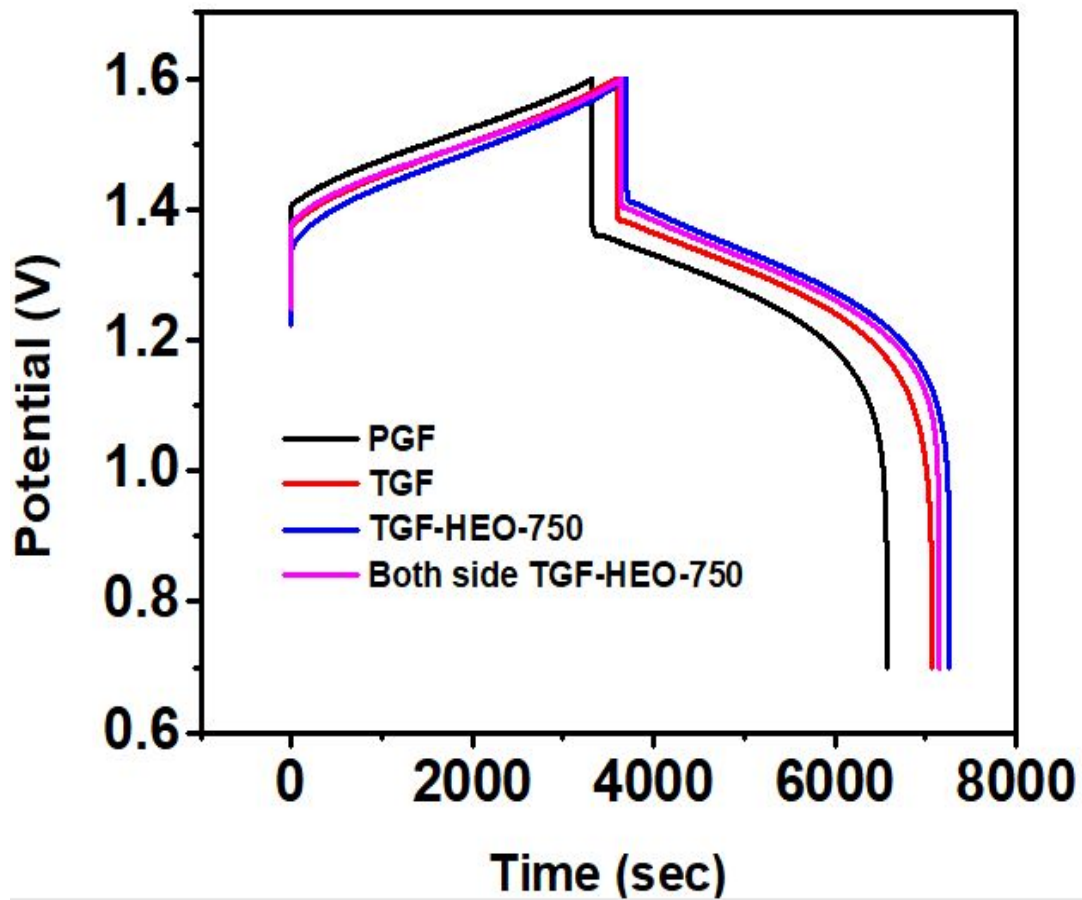

**Figure S16.** Charge-discharge profiles of the cell PGF, TGF, TGF-HEO-750, and both sides TGF-HEO-750 at the current density of  $80 \text{ mA cm}^{-2}$ .

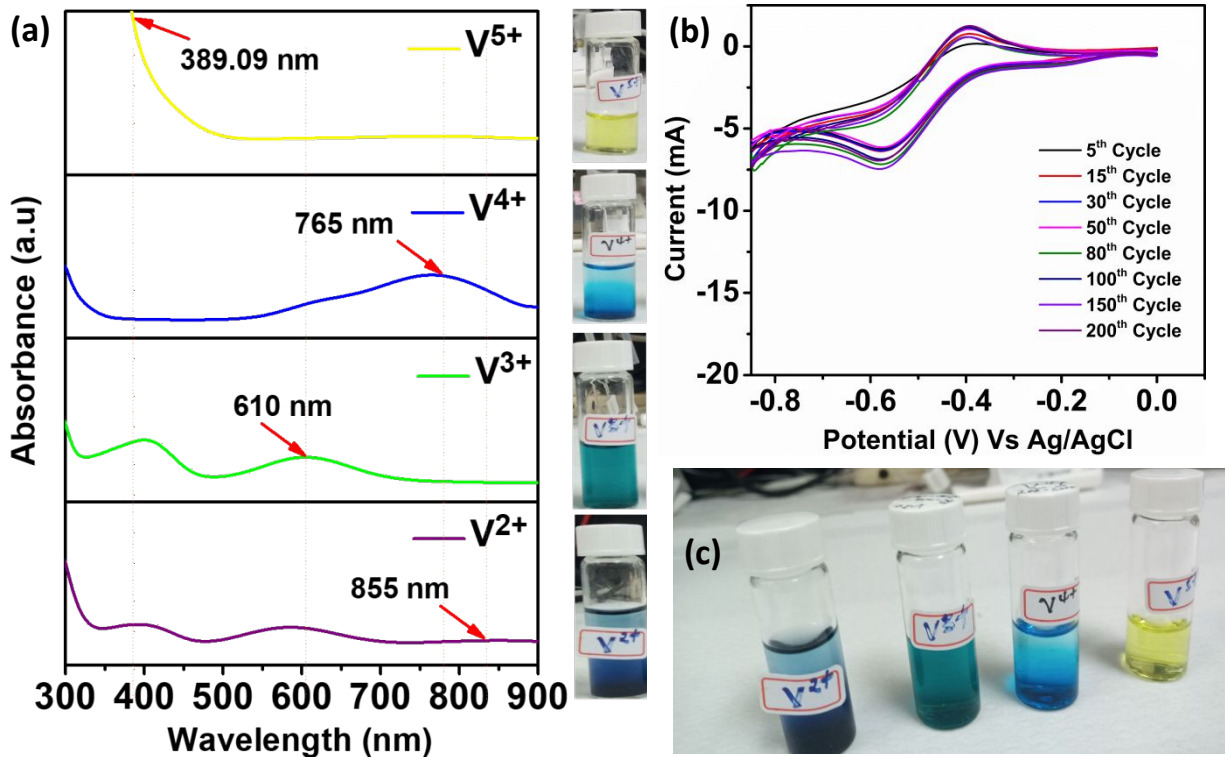

**Figure S17.** (a) UV-Vis spectra of various vanadium electrolytes (1.6 M  $VOSO_4$  + 4.6 M  $H_2SO_4$  solution with DI water by 20 times dilution). (b) Repeated test at  $10 \text{ mV s}^{-1}$  scan rate. (c) Vanadium electrolyte color.



**Table S5** Comparison of the CE, VE, and EE of the TGF-HEO-750 material with those of previously reported metal and metal oxide-based materials.

| Materials                                           | Electrolyte concentration                                      | Membrane type    | Current density (mA cm <sup>-2</sup> ) | CE (%) | VE (%) | EE (%) | Ref              |
|-----------------------------------------------------|----------------------------------------------------------------|------------------|----------------------------------------|--------|--------|--------|------------------|
| TGF-HEO-750                                         | 1.6 M VOSO <sub>4</sub> + 4.6 M H <sub>2</sub> SO <sub>4</sub> | Nafion 212       | 120                                    | 97.77  | 81.42  | 79.61  | <b>This work</b> |
|                                                     |                                                                |                  | 160                                    | 98.10  | 74.76  | 73.34  |                  |
| BiVO <sub>4</sub> -GF                               | 1.6 M VOSO <sub>4</sub> + 4.6 M H <sub>2</sub> SO <sub>4</sub> | Nafion 212       | 100                                    | 97.23  | 75.42  | 77.57  | 4                |
| 3D annealed WO <sub>3</sub> NWs/G S- GF             | 1.6 M VOSO <sub>4</sub> + 2.5 M H <sub>2</sub> SO <sub>4</sub> | Nafion 117       | 80                                     | 94.98  | 83.69  | 79.49  | 5                |
| TiC-GF                                              | 1.6 M VOSO <sub>4</sub> + 4 M H <sub>2</sub> SO <sub>4</sub>   | Fumasep® FAP 450 | 100                                    | 98.63  | 73.60  | 74.62  | 6                |
| Bi <sub>2</sub> O <sub>3</sub> /CNTs-GF             | 1.5 M VOSO <sub>4</sub> + 3 M H <sub>2</sub> SO <sub>4</sub>   | Nepem115         | 50                                     | 94.78  | 83.56  | 88.15  | 7                |
| Ti/IrO <sub>2</sub> :Ta <sub>2</sub> O <sub>5</sub> | 1.7 M VOSO <sub>4</sub> + 4 M H <sub>2</sub> SO <sub>4</sub>   | Nafion 117       | 40                                     | 90     | 90     | 81.0   | 8                |
| Nb-doped h-WO <sub>3</sub> NWs/G F                  | 1.6 M VOSO <sub>4</sub> + 2.5 M H <sub>2</sub> SO <sub>4</sub> | Nafion® 117      | 80                                     | 93.16  | 83.83  | 78.10  | 9                |
| Mn <sub>3</sub> O <sub>4</sub> /CF                  | 2 M VOSO <sub>4</sub> + 2.5 M H <sub>2</sub> SO <sub>4</sub>   | Not specify      | 40                                     | 83.5   | 91.0   | 76.0   | 10               |
| Ir/CF                                               | 0.5 M VOSO <sub>4</sub> + 2 M H <sub>2</sub> SO <sub>4</sub>   | Nafion117®       | 20                                     | 79.7   | 87.5   | 69.7   | 11               |
| W <sub>18</sub> O <sub>49</sub> NWs /GF             | 1.6 M VOSO <sub>4</sub> + 3 M H <sub>2</sub> SO <sub>4</sub>   | Nafion 117       | 80                                     | 94.2   | 85.0   | 80.1   | 12               |
| CeO <sub>2</sub> /GF                                | 2 M VOSO <sub>4</sub> + 2 M H <sub>2</sub> SO <sub>4</sub>     | Nafion 117       | 100                                    | 87.9   | 84.2   | 74.0   | 13               |
| Ta <sub>2</sub> O <sub>5</sub> -GF                  | 1.6 M VOSO <sub>4</sub> + 2.5 M H <sub>2</sub> SO <sub>4</sub> | Nafion 117       | 80                                     | 94.8   | 78.1   | 73.7   | 14               |

## References

- (1) Kabtamu, D. M.; Chen, J.-Y.; Chang, Y.-C.; Wang, C.-H. Water-activated graphite felt as a high-performance electrode for vanadium redox flow batteries. *Journal of Power Sources* **2017**, *341*, 270-279. DOI: 10.1016/j.jpowsour.2016.12.004.
- (2) Sankar, A.; Michos, I.; Dutta, I.; Dong, J.; Angelopoulos, A. P. Enhanced vanadium redox flow battery performance using graphene nanoplatelets to decorate carbon electrodes. *Journal of Power Sources* **2018**, *387*, 91-100.
- (3) Tegegne, B. G.; Kabtamu, D. M.; Li, Y.-Z.; Ou, Y.-T.; Huang, Z.-J.; Hsu, N.-Y.; Ku, H.-H.; Wang, Y.-M.; Wang, C.-H. N-methylphenothiazine as stable and low-cost catholyte for nonaqueous organic redox flow battery. *Journal of Energy Storage* **2023**, *61*, 106753.
- (4) Kabtamu, D. M.; Li, Y.-Z.; Bayeh, A. W.; Ou, Y.-T.; Huang, Z.-J.; Chiang, T.-C.; Huang, H.-C.; Wang, C.-H. Bivo<sub>4</sub>-Decorated Graphite Felt as Highly Efficient Negative Electrode for All Vanadium Redox Flow Batteries. *Available at SSRN 4112168*.
- (5) Kabtamu, D. M.; Chang, Y.-C.; Lin, G.-Y.; Bayeh, A. W.; Chen, J.-Y.; Wondimu, T. H.; Wang, C.-H. Three-dimensional annealed WO<sub>3</sub> nanowire/graphene foam as an electrocatalytic material for all vanadium redox flow batteries. *Sustainable Energy & Fuels* **2017**, *1* (10), 2091-2100.
- (6) Ghimire, P. C.; Schweiss, R.; Scherer, G. G.; Wai, N.; Lim, T. M.; Bhattarai, A.; Nguyen, T. D.; Yan, Q. Titanium carbide-decorated graphite felt as high performance negative electrode in vanadium redox flow batteries. *Journal of Materials Chemistry A* **2018**, *6* (15), 6625-6632.
- (7) Chu, Y.; Zhou, H.; Zhao, H. Bismuth trioxide modified carbon nanotubes as negative electrode catalysts for all vanadium redox flow batteries. *Int. J. Electrochem. Sci* **2020**, *15*, 7733-7743.
- (8) Raghu, S. C.; Ulaganathan, M.; Lim, T. M.; Kazacos, M. S. Electrochemical behaviour of titanium/iridium (IV) oxide: Tantalum pentoxide and graphite for application in vanadium redox flow battery. *Journal of power sources* **2013**, *238*, 103-108.
- (9) Kabtamu, D. M.; Chen, J.-Y.; Chang, Y.-C.; Wang, C.-H. Electrocatalytic activity of Nb-doped hexagonal WO<sub>3</sub> nanowire-modified graphite felt as a positive electrode for vanadium redox flow batteries. *Journal of Materials Chemistry A* **2016**, *4* (29), 11472-11480.
- (10) Kim, K. J.; Park, M.-S.; Kim, J.-H.; Hwang, U.; Lee, N. J.; Jeong, G.; Kim, Y.-J. Novel catalytic effects of Mn<sub>3</sub>O<sub>4</sub> for all vanadium redox flow batteries. *Chemical Communications* **2012**, *48* (44), 5455-5457.

- (11) Wang, W.; Wang, X. Investigation of Ir-modified carbon felt as the positive electrode of an all-vanadium redox flow battery. *Electrochimica Acta* **2007**, *52* (24), 6755-6762.
- (12) Bayeh, A. W.; Kabtamu, D. M.; Chang, Y.-C.; Chen, G.-C.; Chen, H.-Y.; Liu, T.-R.; Wondimu, T. H.; Wang, K.-C.; Wang, C.-H. Hydrogen-Treated Defect-Rich W18O49 Nanowire-Modified Graphite Felt as High-Performance Electrode for Vanadium Redox Flow Battery. *ACS Applied Energy Materials* **2019**, *2* (4), 2541-2551. DOI: <https://doi.org/10.1021/acsaem.8b02158>.
- (13) Bayeh, A. W.; Lin, G.-Y.; Chang, Y.-C.; Kabtamu, D. M.; Chen, G.-C.; Chen, H.-Y.; Wang, K.-C.; Wang, Y.-M.; Chiang, T.-C.; Huang, H.-C. Oxygen-vacancy-rich cubic CeO<sub>2</sub> nanowires as catalysts for vanadium redox flow batteries. *ACS Sustainable Chemistry & Engineering* **2020**, *8* (45), 16757-16765.
- (14) Bayeh, A. W.; Kabtamu, D. M.; Chang, Y.-C.; Chen, G.-C.; Chen, H.-Y.; Lin, G.-Y.; Liu, T.-R.; Wondimu, T. H.; Wang, K.-C.; Wang, C.-H. Ta<sub>2</sub>O<sub>5</sub>-Nanoparticle-Modified Graphite Felt As a High-Performance Electrode for a Vanadium Redox Flow Battery. *ACS Sustainable Chemistry & Engineering* **2018**, *6* (3), 3019-3028. DOI: 10.1021/acssuschemeng.7b02752.
